# Supplementary material for: Direct Activation of TRPC3 Channels by the Antimalarial Agent Artemisinin
Source: MDPI journal article supplement (doi:10.3390/cells9010202), 2020-01-14
Supplement: s1 [file s1]

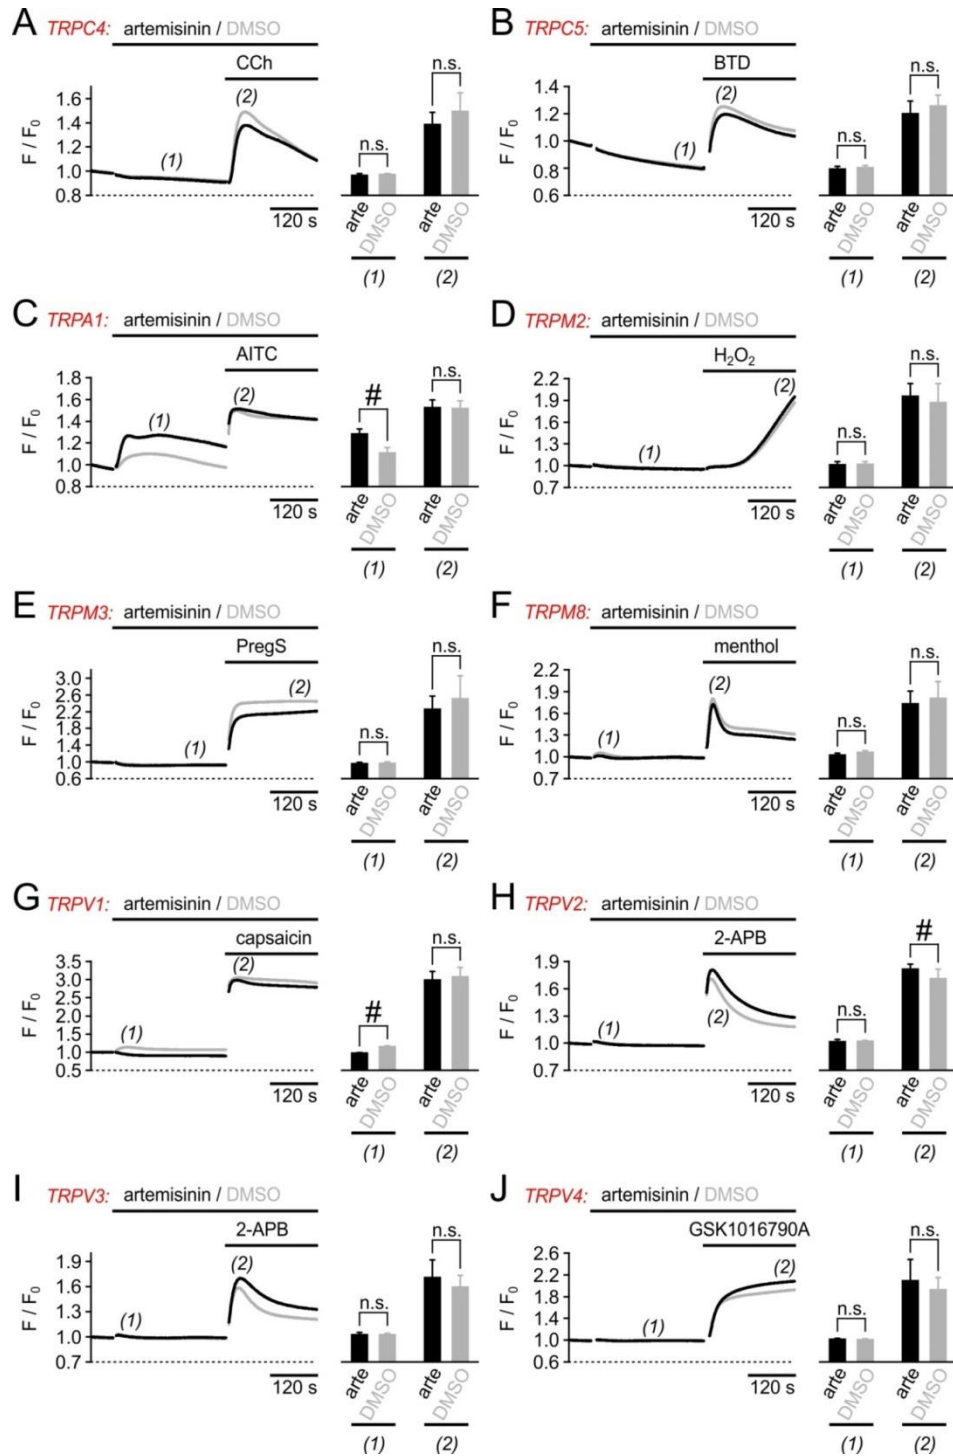

1

2 **Figure S1.** Selectivity of artemisinin effects tested for various TRP channel isoforms. Fluo-4-loaded  
3 suspensions of HEK293 cells overexpressing the indicated TRP channels were challenged with 100  
4  $\mu$ M artemisinin (black lines and bars), or 1% DMSO (grey lines and bars), followed by the addition of  
5 the respective TRP channel activators: 1 mM carbachol (CCh; TRPC4; 2.5  $\mu$ M thapsigargin-pretreated  
6 cells), 50  $\mu$ M of a TRPC5-activating benzothiadiazine (BTD; TRPC5), 100  $\mu$ M allyl isothiocyanate  
7 (TRPA1), 1 mM H<sub>2</sub>O<sub>2</sub> (TRPM2), 30  $\mu$ M pregnenolone sulfate (PregS; TRPM3), 300  $\mu$ M menthol  
8 (TRPM8), 2  $\mu$ M capsaicin (TRPV1), 300  $\mu$ M (TRPV2) or 30  $\mu$ M (TRPV3) 2-aminoethoxydiphenyl  
9 borate (2-APB), and 100 nM GSK1016790A (TRPV4). Time courses (left panels), or means and S.D. of  
10 responses to artemisinin or DMSO (1) and the channel activators (2) determined in 4 experiments  
11 performed in duplicates, each, are shown. #:  $p < 0.05$  for the indicated comparisons of unpaired data.
